# Supplementary material for: Low Genetic Diversity of the Only Clade of the Tick Rhipicephalus microplus in the Neotropics
Source: MDPI journal article supplement (doi:10.3390/pathogens12111344), 2023-11-13
Supplement: s1 [file s1]

**Table S8.** Number of sequences, number of segregating sites, number of haplotypes (h), haplotype diversity (Hd), and nucleotide diversity (pi), of *R. microplus* complex populations.

| Gene/Length (bp) | Region       | N sequences | S  | h  | Hd     | pi     |
|------------------|--------------|-------------|----|----|--------|--------|
| COI/658          | Indomalayan  | 15          | 67 | 10 | 0.8952 | 0.0410 |
|                  | Neotropical  | 43          | 40 | 6  | 0.6844 | 0.0223 |
|                  | Afrotropical | 5           | 41 | 3  | 0.7000 | 0.0317 |
| 16S/446          | Indomalayan  | 10          | 5  | 4  | 0.5333 | 0.0056 |
|                  | Neotropical  | 48          | 14 | 4  | 0.2668 | 0.0116 |
|                  | Afrotropical | 3           | 1  | 2  | 0.6667 | 0.0029 |
|                  | Oceanian     | 4           | 0  | 1  | 0      | 0      |
| ITS/1379         | Indomalayan  | 9           | 0  | 1  | 0      | 0      |
|                  | Neotropical  | 26          | 18 | 6  | 0.3539 | 0.0022 |
| COI+16S/1017     | Mexico       | 15          | 53 | 4  | 0.6191 | 0.0265 |
|                  | Argentina    | 5           | 1  | 2  | 0.4000 | 0.0004 |
|                  | Brazil       | 9           | 2  | 3  | 0.4167 | 0.0004 |
|                  | Uruguay      | 2           | 0  | 1  | 0      | 0      |
