# Supplementary material for: Low Genetic Diversity of the Only Clade of the Tick Rhipicephalus microplus in the Neotropics
Source: MDPI journal article supplement (doi:10.3390/pathogens12111344), 2023-11-13
Supplement: s1 [file s1]

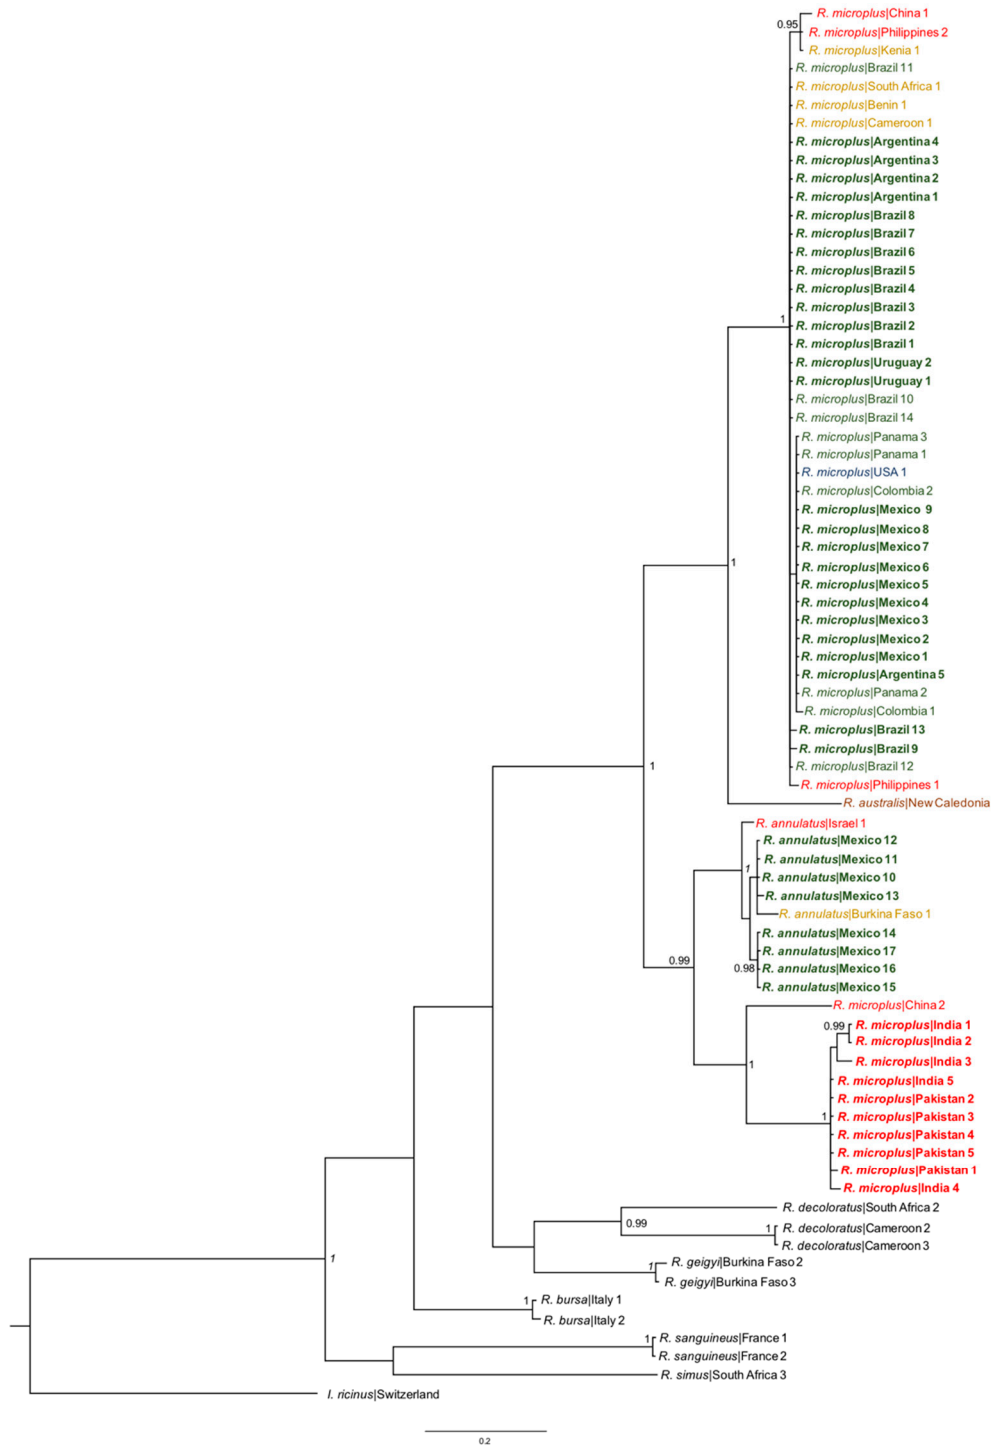

Supplementary File 4. Figure S1.

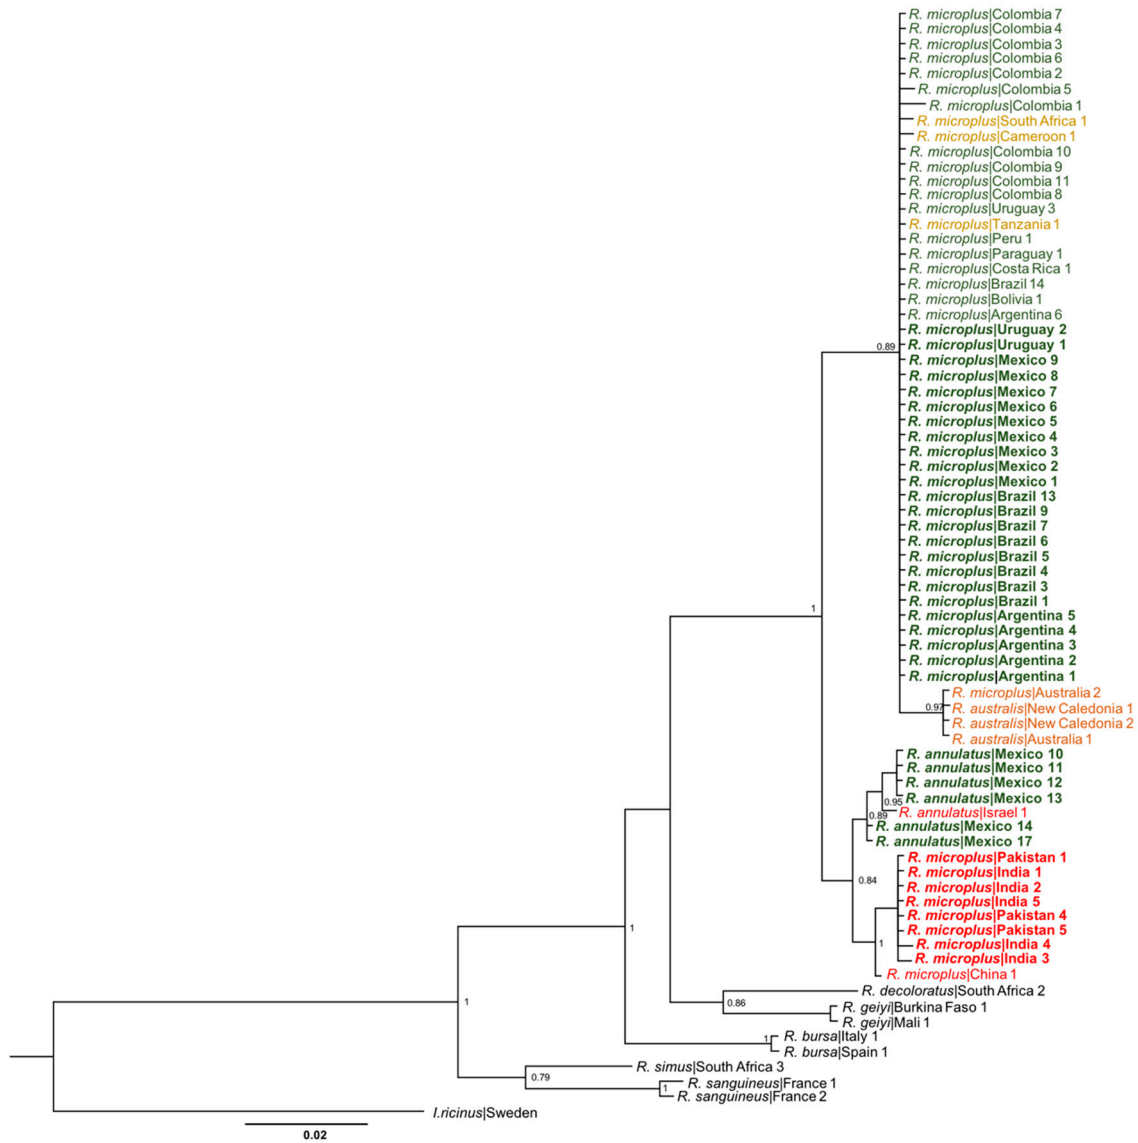

Supplementary File 4. Figure S2.

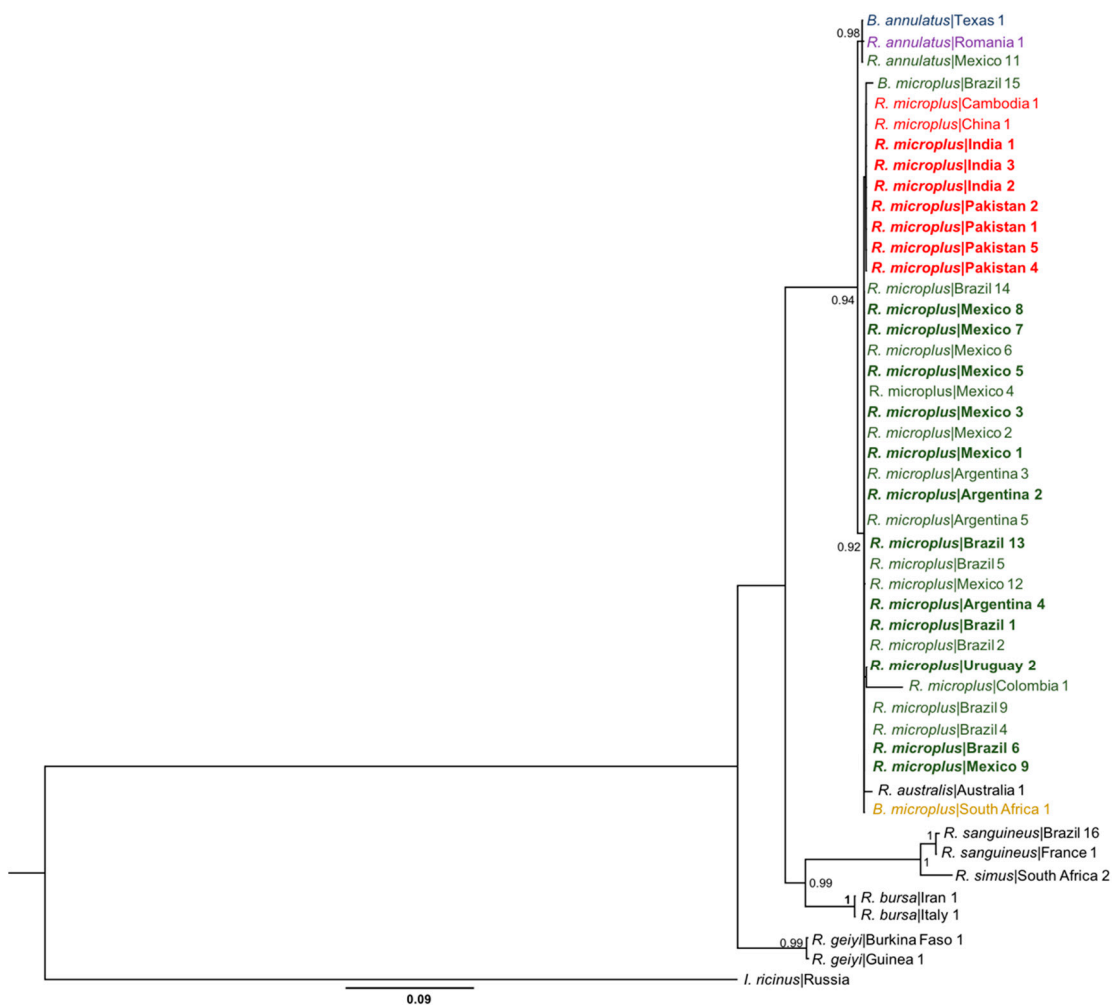

Supplementary File 4. Figure S3.

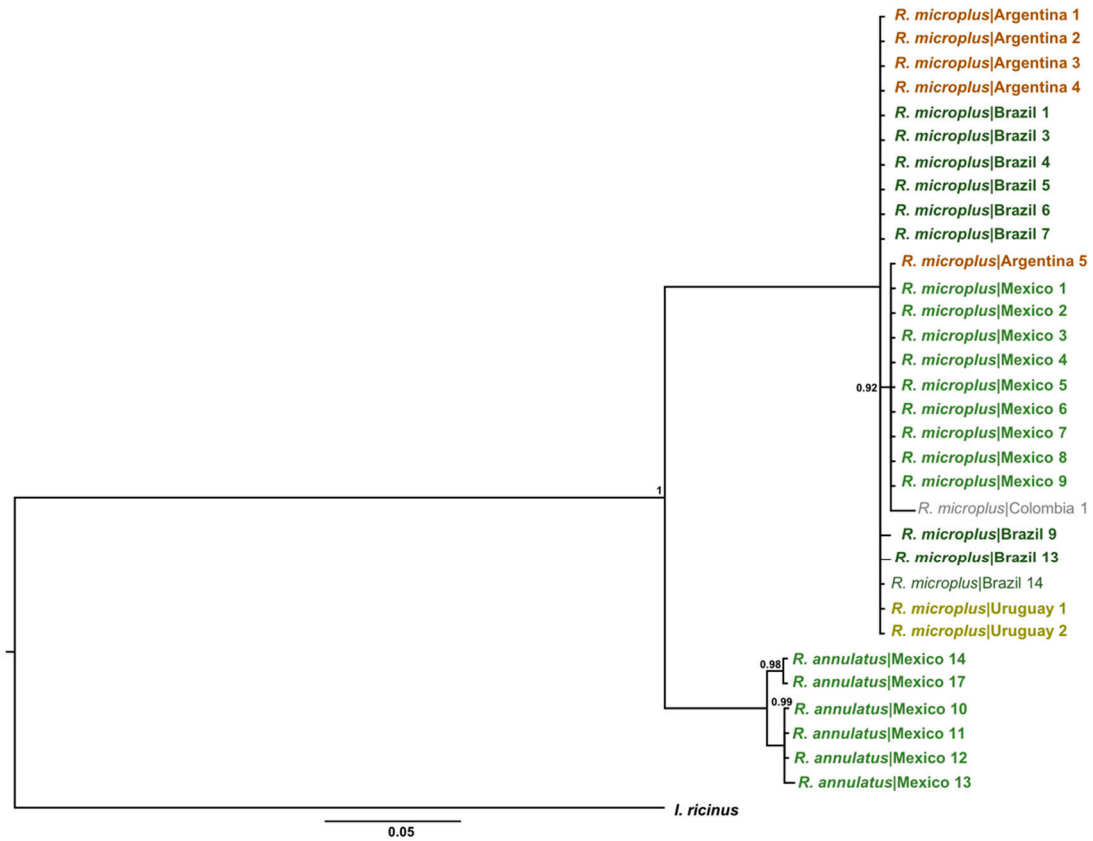

Supplementary File 4. Figure S4.
