# Supplementary material for: Low Genetic Diversity of the Only Clade of the Tick Rhipicephalus microplus in the Neotropics
Source: Pathogens. 2023 Nov 13;12(11):1344. doi: 10.3390/pathogens12111344 (PMC10675012; doi:10.3390/pathogens12111344)
Supplement: Supplementary file 1 [file pathogens-12-01344-s001.zip]

Archive with 4 entries (4 files):
- Supplementary File 1.xlsx
- Supplementary File 2.xlsx
- Supplementary File 3.pdf
- Supplementary File 4.pdf
