# Supplementary material for: Low Genetic Diversity of the Only Clade of the Tick Rhipicephalus microplus in the Neotropics
Source: Pathogens. 2023 Nov 13;12(11):1344. doi: 10.3390/pathogens12111344 (PMC10675012; doi:10.3390/pathogens12111344)
Supplement: Supplementary file 1 [file pathogens-12-01344-s001.zip › Supplementary File 1.xlsx]

## Sheet: phylogeny COI
Supplementary File 1: Table S1 GenBank/BOLD accession numbers corresponding to the COI sequences utilized for phylogeny construction
Phylogeny Ids	Specie	GenBank Accesion Number GenBank/BOLD	Country/City	Publication/Source
R. microplus|Argentina 1	R. microplus	RHMCP023	Argentina	Study sampling
R. microplus|Argentina 2	R. microplus	RHMCP021
R. microplus|Argentina 3	R. microplus	RHMCP020
R. microplus|Argentina 4	R. microplus	RHMCP019
R. microplus|Argentina 5	R. microplus	RHMCP022
R. microplus|Benin	R. microplus	KY678120	Benin	Duron et al., 2017
R. microplus|Brazil 1	R. microplus	RHMCP033	Brazil	Study sampling
R. microplus|Brazil 2	R. microplus	RHMCP032
R. microplus|Brazil 3	R. microplus	RHMCP031
R. microplus|Brazil 4	R. microplus	RHMCP030
R. microplus|Brazil 5	R. microplus	RHMCP029
R. microplus|Brazil 6	R. microplus	RHMCP026
R. microplus|Brazil 7	R. microplus	RHMCP025
R. microplus|Brazil 8	R. microplus	RHMCP024
R. microplus|Brazil 9	R. microplus	RHMCP028
R. microplus|Brazil 10	R. microplus	KP226159	Brazil	Csordas et al., 2016
R. microplus|Brazil 11	R. microplus	KC503261	Brazil	Burger et al., 2014b
R. microplus|Brazil 12	R. microplus	KP226170	Brazil	Csordas et al., 2016
R. microplus|Brazil 13	R. microplus	RHMCP027	Brazil	Study sampling
R. microplus|Brazil 14	R. microplus	KP226161	Brazil	Csordas et al., 2016
R. annulatus|Burkina Faso 1	R. annulatus	KY678123	Burkina Faso	Duron et al., 2017
R. geiyi|Burkina Faso 2	R. geiyi	KC503263	Burkina Faso	Burger et al., 2014b
R. geiyi|Burkina Faso 3	R. geiyi	KY678125	Burkina Faso	Duron et al., 2017
R.microplus|Cameroon 1	R. microplus	MK648412	Cameroon	Genbank Direct Submission
R. decoloratus|Cameroon 2	R. decoloratus	MK648413
R. decoloratus|Cameroon 3	R. decoloratus	MK648414
R. microplus|Colombia 1	R. microplus	KT906177	Colombia	Paternina et al., 2016
R. microplus|Colombia 2	R. microplus	KT906180
R. microplus|China 1	R. microplus	HM193863	China	GenBank Direct Submission
R. microplus|China 2	R. microplus	KF583579	China	Lv et al., 2014
R.sanguineus|France 1	R. sanguineus	MH630346	France	Nava et al., 2018
R.sanguineus|France 2	R. sanguineus	MH630347
R.microplus|India 1	R. microplus	RHMCP036	India	Study sampling
R.microplus|India 2	R. microplus	RHMCP040
R.microplus|India 3	R. microplus	RHMCP038
R.microplus|India 4	R. microplus	RHMCP039
R.microplus|India 5	R. microplus	RHMCP037
R. annulatus|Israel	R. annulatus	AF132825	Israel	Murrel et al., 2000
R.bursa|Italy 1	R. bursa	KC243927	Italy	Dantas Torres et al., 2013
R.bursa|Italy 2	R. bursa	KC243931
R.microplus|Kenia	R. microplus	KX228549	Kenia	Goolsby et al., 2016
R. microplus|Mexico 1	R. microplus	RHMCP017	México	Study sampling
R. microplus|Mexico 2	R. microplus	RHMCP014
R. microplus|Mexico 3	R. microplus	RHMCP013
R. microplus|Mexico 4	R. microplus	RHMCP012
R. microplus|Mexico 5	R. microplus	RHMCP010
R. microplus|Mexico 6	R. microplus	RHMCP009
R. microplus|Mexico 7	R. microplus	RHMCP008
R. microplus|Mexico 8	R. microplus	RHMCP007
R. microplus|Mexico 9	R. microplus	RHMCP006
R. annulatus|Mexico 10	R. annulatus	RHMCP004
R. annulatus|Mexico 11	R. annulatus	RHMCP003
R. annulatus|Mexico 12	R. annulatus	RHMCP001
R. annulatus|Mexico 13	R. annulatus	RHMCP002
R. annulatus|Mexico 14	R. annulatus	RHMCP011
R. annulatus|Mexico 15	R. annulatus	RHMCP018
R. annulatus|Mexico 16	R. annulatus	RHMCP016
R. annulatus|Mexico 17	R. annulatus	RHMCP015
R.australis|New Caledonia	R. australis	KY678122	New Caledonia	Duron et al., 2017
R.microplus|Pakistan 1	R. microplus	RHMCP042	Pakistan	Study sampling
R.microplus|Pakistan 2	R. microplus	RHMCP041
R.microplus|Pakistan 3	R. microplus	RHMCP043
R.microplus|Pakistan 4	R. microplus	RHMCP044
R.microplus|Pakistan 5	R. microplus	RHMCP046
R. microplus|Panama 1	R. microplus	KF200156	Panama	Miller et al., 2016
R. microplus|Panama 3	R. microplus	KF200106
R. microplus|Panama 2	R. microplus	KF200127
R. microplus|Philippines 1	R. microplus	KX228548	Philippines	Goolsby et al., 2016
R. microplus|Philippines 2	R. microplus	KX228545
R. microplus|South Africa 1	R. microplus	KY678117	South Africa	Duron et al., 2017
R. decoloratus|South Africa 2	R. decoloratus	KY678130
R. simus|South Africa 3	R.simus	AF132840	South Africa	Murrel et al., 2000
R. microplus|USA	R. microplus	KP143546	USA	McCooke et al., 2015
R. microplus|Uruguay 1	R. microplus	RHMCP035	Uruguay	Study sampling
R. microplus|Uruguay 2	R. microplus	RHMCP034
Ixodes ricinus|outgroup	I. ricinus	MH33634	Switzerland	Al-Khafaji et al., 2018

## Sheet: phylogeny 16S rDNA
Supplementary File 1: Table S2 GenBank/BOLD accession numbers corresponding to the 16S rDNA sequences utilized for phylogeny construction
Phylogeny Ids	Specie	GenBank Accesion Number GenBank/BOLD	Country/City	Publication/Source
R.microplus|Argentina 1	R.microplus	RHMCP023	Argentina	Study Sampling
R.microplus|Argentina 2	R.microplus	RHMCP021
R.microplus|Argentina 3	R.microplus	RHMCP020
R.microplus|Argentina 4	R.microplus	RHMCP019
R.microplus|Argentina 5	R.microplus	RHMCP022
R.microplus|Argentina 6	R.microplus	EU918176	Argentina	Labruna et al., 2009
R.australis|Australia 1	R.australis	JN828950	Australia	Estrada-Peña et al., 2012
R.microplus|Australia 2	R.australis	EU918192	Australia	Labruna et al., 2009
R. microplus|Brazil 1	R.microplus	RHMCP033	Brazil	Study Sampling
R. microplus|Brazil 3	R.microplus	RHMCP031
R. microplus|Brazil 4	R.microplus	RHMCP030
R. microplus|Brazil 5	R.microplus	RHMCP029
R. microplus|Brazil 6	R.microplus	RHMCP026
R. microplus|Brazil 7	R.microplus	RHMCP025
R. microplus|Brazil 9	R.microplus	RHMCP028
R. microplus|Brazil 13	R.microplus	RHMCP027
R. microplus|Brazil 14	R.microplus	EU918178	Brazil	Labruna et al., 2009
R.microplus|Bolivia 1	R.microplus	EU918177	Bolivia	Labruna et al., 2009
R.geigyi|Burkina Faso 1	R.geiyi	KY676812	Burkina Faso	Duron et al., 2017
R.microplus|Cameroon 1	R.microplus	MG708432	Cameroon	Silatsa et al., 2019
R.microplus|China 1	R.microplus	JX051062	China	Lv et la., 2014
R.microplus|Colombia 1	R.microplus	KT906174	Colombia	Paternina et al., 2016
R.microplus|Colombia 2	R.microplus	MF351562	Colombia	Rivera-Paez et al., 2018
R. microplus|Colombia 3	R.microplus	MF351563
R.microplus|Colombia 4	R.microplus	MF351564
R.microplus|Colombia 5	R.microplus	MF351566
R.microplus|Colombia 6	R.microplus	MF351567
R.microplus|Colombia 7	R.microplus	MF351568
R.microplus|Colombia 8	R.microplus	MN650725	Colombia	Segura et al., 2020
R.microplus|Colombia 9	R.microplus	MN650726
R.microplus|Colombia 10	R.microplus	MN650728
R.microplus|Colombia 11	R.microplus	MN650729
R.microplus|Costa Rica 1	R.microplus	EU918179	Costa Rica	Labruna et al., 2009
R.sanguineus|France 1	R.sanguineus	MH630342	France	Nava et al., 2018
R.sanguineus|France 2	R.sanguineus	MH630343
R.microplus|India 1	R.microplus	RHMCP036	India	Study Sampling
R.microplus|India 2	R.microplus	RHMCP040
R.microplus|India 3	R.microplus	RHMCP038
R.microplus|India 4	R.microplus	RHMCP039
R.microplus|India 5	R.microplus	RHMCP037
R.annulatus|Israel 1	R.annulatus	KF219728	Israel	GenBank Direct Submission
R.bursa|Italy 1	R.bursa	KC243871	Italy	Dantas-Torres et al., 2013
R.geiyi|Mali 1	R.geiyi	KF569942	Mali	McCoy et al., 2014
R. microplus|Mexico 1	R.microplus	RHMCP017	Mexico	Study Sampling
R. microplus|Mexico 2	R.microplus	RHMCP014
R. microplus|Mexico 3	R.microplus	RHMCP013
R. microplus|Mexico 4	R.microplus	RHMCP012
R. microplus|Mexico 5	R.microplus	RHMCP010
R. microplus|Mexico 6	R.microplus	RHMCP009
R. microplus|Mexico 7	R.microplus	RHMCP008
R. microplus|Mexico 8	R.microplus	RHMCP007
R. microplus|Mexico 9	R.microplus	RHMCP006
R. annulatus|Mexico 10	R.annulatus	RHMCP004
R. annulatus|Mexico 11	R.annulatus	RHMCP003
R. annulatus|Mexico 12	R.annulatus	RHMCP001
R. annulatus|Mexico 13	R.annulatus	RHMCP002
R. annulatus|Mexico 14	R.annulatus	RHMCP011
R. annulatus|Mexico 17	R.annulatus	RHMCP015
R.australis|New Caledonia 1	R.australis	KY676808	New Caledonia	Duron et al., 2017
R.australis|New Caledonia 2	R.australis	EU918191	New Caledonia	Labruna et al., 2009
R.microplus|Pakistan 1	R.microplus	RHMCP042	Pakistan	Study Sampling
R.microplus|Pakistan 4	R.microplus	RHMCP044
R.microplus|Pakistan 5	R.microplus	RHMCP046
R.microplus|Paraguay 1	R.microplus	EU918180	Paraguay	Labruna et al., 2009
R.microplus|Peru 1	R.microplus	EU918181	Peru
R.microplus|South Africa 1	R.microplus	EU918182	South Africa
R.decoloratus|South Africa 2	R.decoloratus	EU918193	South Africa
R.simus|South Africa 3	R.simus	KJ613641	South Africa	Halajian et al., 2016
R.bursa|Spain 1	R.bursa	AJ002956	Spain	GenBank Direct Submission
R.microplus|Tanzania 1	R.microplus	EU918183	Tanzania	Labruna et al., 2009
R. microplus|Uruguay 1	R.microplus	RHMCP035	Uruguay	Study Sampling
R. microplus|Uruguay 2	R.microplus	RHMCP034
R.microplus|Uruguay 3	R.microplus	EU918184	Uruguay	Labruna et al., 2009
Ixodes ricinus|outgroup	I. ricinus	GU074593	Sweden	Noureddine et a., 2011

## Sheet: phylogeny ITS-2
Supplementary File 1: Table S3 GenBank/BOLD accession numbers corresponding to the ITS-2 gene sequences utilized for phylogeny construction
Phylogeny Ids	Specie	GenBank Accesion Number GenBank/BOLD	Country/City	Publication/Source
R.australis|Australia 1	R.australis	KC503268	Australia	Burguer et al., 2014
R. microplus|Argentina 2	R.microplus	RHMCP021	Argentina	Study Sampling
R. microplus|Argentina 3	R.microplus	RHMCP020
R. microplus|Argentina 4	R.microplus	RHMCP019
R. microplus|Argentina 5	R.microplus	RHMCP022
R. microplus|Brazil 1	R.microplus	RHMCP033	Brazil	Study Sampling
R. microplus|Brazil 2	R.microplus	RHMCP041	Brazil
R. microplus|Brazil 4	R.microplus	RHMCP030	Brazil
R. microplus|Brazil 5	R.microplus	RHMCP029	Brazil
R. microplus|Brazil 6	R.microplus	RHMCP026	Brazil
R. microplus|Brazil 9	R.microplus	RHMCP028	Brazil
R. microplus|Brazil 13	R.microplus	RHMCP027	Brazil
R.microplus|Brazil 14	R.microplus	KC503273	Brazil	Burguer et al., 2014a
R.microplus|Brazil 15	R.microplus	U97714	Brazil	Barker et al., 1998
R.sanguineus|Brazil 16	R.microplus	MH616088	Brazil	Nava et al., 2018
R.geiyi|Burkina Faso 1	R.geiyi	KC503270	Burkina Faso	Burguer et al., 2014a
R.microplus|Cambodia 1	R.microplus	KC503272	Cambodia	Burguer et al., 2014a
R.microplus|China 1	R.microplus	KC503274	China	Burguer et al., 2014a
R. microplus|Colombia 1	R.microplus	MF353138	Colombia	Rivera-Paez et al., 2017
R.sanguineus|France 1	R.sanguineus	MH616087	France	Nava et al., 2018
R.geiyi|Guinea 1	R.geiyi	MT112112	Guinea	Makenov, et al., 2021
R.microplus|India 1	R.microplus	RHMCP036	India	Study Sampling
R.microplus|India 2	R.microplus	RHMCP040
R.microplus|India 3	R.microplus	RHMCP038
R.bursa|Iran 1	R.bursa	KM986320	Iran	GenBank Direct Submission
R.bursa|Italy 1	R.bursa	KF499562	Italy	Latrofa et al., 2013
R. microplus|Mexico 1	R.microplus	RHMCP017	Mexico	Study Sampling
R. microplus|Mexico 2	R.microplus	RHMCP014
R. microplus|Mexico 3	R.microplus	RHMCP013
R. microplus|Mexico 4	R.microplus	RHMCP012
R. microplus|Mexico 5	R.microplus	RHMCP010
R. microplus|Mexico 6	R.microplus	RHMCP009
R. microplus|Mexico 7	R.microplus	RHMCP008
R. microplus|Mexico 8	R.microplus	RHMCP007
R. microplus|Mexico 9	R.microplus	RHMCP006
R. annulatus|Mexico 11	R.annulatus	RHMCP003
R. microplus|Mexico 12	R.microplus	MT462238	Mexico	GenBank Direct Submission
R.microplus|Pakistan 1	R.microplus	RHMCP042	Pakistan	Study Sampling
R.microplus|Pakistan 2	R.microplus	RHMCP041
R.microplus|Pakistan 4	R.microplus	RHMCP044
R.microplus|Pakistan 5	R.microplus	RHMCP046
R.annulatus|Romania 1	R.annulatus	KC503267	Romania	Burguer et al., 2014a
R.microplus|South Africa 1	R.microplus	U97715	South Africa	Barker et al., 1998
R.simus|South Africa 2	R.simus	AF271284	South Africa	Murrel et al., 2001
R.annulatus|Texas 1	R.annulatus	AF271270	Texas	Murrel et al., 2001
R. microplus|Uruguay 2	R.microplus	RHMCP034	Uruguay	Study Sampling
Ixodes ricinus|outgroup	I.ricinus	JF703110	Russia	Bugmyrin et al., 2013
