# Supplementary material for: Low Genetic Diversity of the Only Clade of the Tick Rhipicephalus microplus in the Neotropics
Source: Pathogens. 2023 Nov 13;12(11):1344. doi: 10.3390/pathogens12111344 (PMC10675012; doi:10.3390/pathogens12111344)
Supplement: Supplementary file 1 [file pathogens-12-01344-s001.zip › Supplementary File 2.xlsx]

## Sheet: % Identities COI
Table S4. Distance matrix showing the genetic distances between each pair of sequences (% Identity) construted with the aligment of COI partial sequences from the Neartic-Neotropic
	R.microplus|Uruguay 1	R.microplus|Uruguay 2	R.microplus|Brazil 1	R.microplus|Brazil 2	R.microplus|Brazil 3	R.microplus|Brazil 4	R.microplus|Brazil 5	R.microplus|Brazil 6	R.microplus|Brazil 7	R.microplus|Brazil 8	R.microplus|Argentina 1	R.microplus|Argentina 2	R.microplus|Argentina 3	R.microplus|Argentina 4	R.microplus|Brazil 9	R.microplus|Brazil 10	R.microplus|Brazil 11	R.microplus|Brazil 12	R.microplus|Brazil 13	R.microplus|Argentina 5	R.microplus|Mexico 1	R.microplus|Mexico 2	R.microplus|Mexico 3	R.microplus|Mexico 4	R.microplus|Mexico 5	R.microplus|Mexico 6	R.microplus|Mexico 7	R.microplus|Mexico 8	R.microplus|Mexico 9	R.microplus|Colombia 1	R.microplus|Panama 1	R.microplus|Panama 2	R.microplus|Panama 3	R.microplus|Brazil 14	R.microplus|Colombia 2	R.annulatus|Mexico 10	R.annulatus|Mexico 11	R.annulatus|Mexico 12	R.annulatus|Mexico 13	R.annulatus|Mexico 14	R.annulatus|Mexico 15	R.annulatus|Mexico 16	R.annulatus|Mexico 17	I.ricinus|Switzerland
R.microplus|Uruguay 1		100	100	100	100	100	100	100	100	100	100	100	100	100	100	100	100	99.8	99.8	99.8	99.8	99.8	99.8	99.8	99.8	99.8	99.8	99.8	99.8	99.8	99.8	99.8	99.8	99.8	99.7	93.4	93.4	93.4	93.5	93.6	93.6	93.6	93.4	75.7
R.microplus|Uruguay2	100		100	100	100	100	100	100	100	100	100	100	100	100	100	100	100	99.8	99.8	99.8	99.8	99.8	99.8	99.8	99.8	99.8	99.8	99.8	99.8	99.8	99.8	99.8	99.8	99.8	99.7	93.4	93.4	93.4	93.5	93.6	93.6	93.6	93.4	75.7
R.microplus|Brazil 1	100	100		100	100	100	100	100	100	100	100	100	100	100	100	100	100	99.8	99.8	99.8	99.8	99.8	99.8	99.8	99.8	99.8	99.8	99.8	99.8	99.8	99.8	99.8	99.8	99.8	99.7	93.4	93.4	93.4	93.5	93.6	93.6	93.6	93.4	75.7
R.microplus|Brazil 2	100	100	100		100	100	100	100	100	100	100	100	100	100	100	100	100	99.8	99.8	99.8	99.8	99.8	99.8	99.8	99.8	99.8	99.8	99.8	99.8	99.8	99.8	99.8	99.8	99.8	99.7	93.4	93.4	93.4	93.5	93.6	93.6	93.6	93.4	75.7
R.microplus|Brazil 3	100	100	100	100		100	100	100	100	100	100	100	100	100	100	100	100	99.8	99.8	99.8	99.8	99.8	99.8	99.8	99.8	99.8	99.8	99.8	99.8	99.8	99.8	99.8	99.8	99.8	99.7	93.4	93.4	93.4	93.5	93.6	93.6	93.6	93.4	75.7
R.microplus|Brazil 4	100	100	100	100	100		100	100	100	100	100	100	100	100	100	100	100	99.8	99.8	99.8	99.8	99.8	99.8	99.8	99.8	99.8	99.8	99.8	99.8	99.8	99.8	99.8	99.8	99.8	99.7	93.4	93.4	93.4	93.5	93.6	93.6	93.6	93.4	75.7
R.microplus|Brazil 5	100	100	100	100	100	100		100	100	100	100	100	100	100	100	100	100	99.8	99.8	99.8	99.8	99.8	99.8	99.8	99.8	99.8	99.8	99.8	99.8	99.8	99.8	99.8	99.8	99.8	99.7	93.4	93.4	93.4	93.5	93.6	93.6	93.6	93.4	75.7
R.microplus|Brazil 6	100	100	100	100	100	100	100		100	100	100	100	100	100	100	100	100	99.8	99.8	99.8	99.8	99.8	99.8	99.8	99.8	99.8	99.8	99.8	99.8	99.8	99.8	99.8	99.8	99.8	99.7	93.4	93.4	93.4	93.5	93.6	93.6	93.6	93.4	75.7
R.microplus|Brazil 7	100	100	100	100	100	100	100	100		100	100	100	100	100	100	100	100	99.8	99.8	99.8	99.8	99.8	99.8	99.8	99.8	99.8	99.8	99.8	99.8	99.8	99.8	99.8	99.8	99.8	99.7	93.4	93.4	93.4	93.5	93.6	93.6	93.6	93.4	75.7
R.microplus|Brazil 8	100	100	100	100	100	100	100	100	100		100	100	100	100	100	100	100	99.8	99.8	99.8	99.8	99.8	99.8	99.8	99.8	99.8	99.8	99.8	99.8	99.8	99.8	99.8	99.8	99.8	99.7	93.4	93.4	93.4	93.5	93.6	93.6	93.6	93.4	75.7
R.microplus|Argentina 1	100	100	100	100	100	100	100	100	100	100		100	100	100	100	100	100	99.8	99.8	99.8	99.8	99.8	99.8	99.8	99.8	99.8	99.8	99.8	99.8	99.8	99.8	99.8	99.8	99.8	99.7	93.4	93.4	93.4	93.5	93.6	93.6	93.6	93.4	75.7
R.microplus|Argentina 2	100	100	100	100	100	100	100	100	100	100	100		100	100	100	100	100	99.8	99.8	99.8	99.8	99.8	99.8	99.8	99.8	99.8	99.8	99.8	99.8	99.8	99.8	99.8	99.8	99.8	99.7	93.4	93.4	93.4	93.5	93.6	93.6	93.6	93.4	75.7
R.microplus|Argentina 3	100	100	100	100	100	100	100	100	100	100	100	100		100	100	100	100	99.8	99.8	99.8	99.8	99.8	99.8	99.8	99.8	99.8	99.8	99.8	99.8	99.8	99.8	99.8	99.8	99.8	99.7	93.4	93.4	93.4	93.5	93.6	93.6	93.6	93.4	75.7
R.microplus|Argentina 4	100	100	100	100	100	100	100	100	100	100	100	100	100		100	100	100	99.8	99.8	99.8	99.8	99.8	99.8	99.8	99.8	99.8	99.8	99.8	99.8	99.8	99.8	99.8	99.8	99.8	99.7	93.4	93.4	93.4	93.5	93.6	93.6	93.6	93.4	75.7
R.microplus|Brazil 9	100	100	100	100	100	100	100	100	100	100	100	100	100	100		100	100	99.8	99.8	99.8	99.8	99.8	99.8	99.8	99.8	99.8	99.8	99.8	99.8	99.8	99.8	99.8	99.8	99.8	99.7	93.4	93.4	93.4	93.5	93.6	93.6	93.6	93.4	75.7
R.microplus|Brazil 10	100	100	100	100	100	100	100	100	100	100	100	100	100	100	100		100	99.8	99.8	99.8	99.8	99.8	99.8	99.8	99.8	99.8	99.8	99.8	99.8	99.8	99.8	99.8	99.8	99.8	99.7	93.4	93.4	93.4	93.5	93.6	93.6	93.6	93.4	75.7
R.microplus|Brazil 11	100	100	100	100	100	100	100	100	100	100	100	100	100	100	100	100		99.8	99.8	99.8	99.8	99.8	99.8	99.8	99.8	99.8	99.8	99.8	99.8	99.8	99.8	99.8	99.8	99.8	99.7	93.4	93.4	93.4	93.5	93.6	93.6	93.6	93.4	75.7
R.microplus|Brazil 12	99.8	99.8	99.8	99.8	99.8	99.8	99.8	99.8	99.8	99.8	99.8	99.8	99.8	99.8	99.8	99.8	99.8		99.7	99.7	99.7	99.7	99.7	99.7	99.7	99.7	99.7	99.7	99.7	99.7	99.7	99.7	99.7	99.7	99.5	93.3	93.3	93.3	93.3	93.4	93.4	93.4	93.3	75.5
R.microplus|Brazil 13	99.8	99.8	99.8	99.8	99.8	99.8	99.8	99.8	99.8	99.8	99.8	99.8	99.8	99.8	99.8	99.8	99.8	99.7		99.7	99.7	99.7	99.7	99.7	99.7	99.7	99.7	99.7	99.7	99.7	99.7	99.7	99.7	99.7	99.7	93.3	93.3	93.3	93.3	93.4	93.4	93.4	93.3	75.7
R.microplus|Argentina 5	99.8	99.8	99.8	99.8	99.8	99.8	99.8	99.8	99.8	99.8	99.8	99.8	99.8	99.8	99.8	99.8	99.8	99.7	99.7		100	100	100	100	100	100	100	100	100	100	100	100	100	99.7	99.8	93.3	93.3	93.3	93.3	93.4	93.4	93.4	93.3	75.7
R.microplus|Mexico 1	99.8	99.8	99.8	99.8	99.8	99.8	99.8	99.8	99.8	99.8	99.8	99.8	99.8	99.8	99.8	99.8	99.8	99.7	99.7	100		100	100	100	100	100	100	100	100	100	100	100	100	99.7	99.8	93.3	93.3	93.3	93.3	93.4	93.4	93.4	93.3	75.7
R.microplus|Mexico 2	99.8	99.8	99.8	99.8	99.8	99.8	99.8	99.8	99.8	99.8	99.8	99.8	99.8	99.8	99.8	99.8	99.8	99.7	99.7	100	100		100	100	100	100	100	100	100	100	100	100	100	99.7	99.8	93.3	93.3	93.3	93.3	93.4	93.4	93.4	93.3	75.7
R.microplus|Mexico 3	99.8	99.8	99.8	99.8	99.8	99.8	99.8	99.8	99.8	99.8	99.8	99.8	99.8	99.8	99.8	99.8	99.8	99.7	99.7	100	100	100		100	100	100	100	100	100	100	100	100	100	99.7	99.8	93.3	93.3	93.3	93.3	93.4	93.4	93.4	93.3	75.7
R.microplus|Mexico 4	99.8	99.8	99.8	99.8	99.8	99.8	99.8	99.8	99.8	99.8	99.8	99.8	99.8	99.8	99.8	99.8	99.8	99.7	99.7	100	100	100	100		100	100	100	100	100	100	100	100	100	99.7	99.8	93.3	93.3	93.3	93.3	93.4	93.4	93.4	93.3	75.7
R.microplus|Mexico 5	99.8	99.8	99.8	99.8	99.8	99.8	99.8	99.8	99.8	99.8	99.8	99.8	99.8	99.8	99.8	99.8	99.8	99.7	99.7	100	100	100	100	100		100	100	100	100	100	100	100	100	99.7	99.8	93.3	93.3	93.3	93.3	93.4	93.4	93.4	93.3	75.7
R.microplus|Mexico 6	99.8	99.8	99.8	99.8	99.8	99.8	99.8	99.8	99.8	99.8	99.8	99.8	99.8	99.8	99.8	99.8	99.8	99.7	99.7	100	100	100	100	100	100		100	100	100	100	100	100	100	99.7	99.8	93.3	93.3	93.3	93.3	93.4	93.4	93.4	93.3	75.7
R.microplus|Mexico 7	99.8	99.8	99.8	99.8	99.8	99.8	99.8	99.8	99.8	99.8	99.8	99.8	99.8	99.8	99.8	99.8	99.8	99.7	99.7	100	100	100	100	100	100	100		100	100	100	100	100	100	99.7	99.8	93.3	93.3	93.3	93.3	93.4	93.4	93.4	93.3	75.7
R.microplus|Mexico 8	99.8	99.8	99.8	99.8	99.8	99.8	99.8	99.8	99.8	99.8	99.8	99.8	99.8	99.8	99.8	99.8	99.8	99.7	99.7	100	100	100	100	100	100	100	100		100	100	100	100	100	99.7	99.8	93.3	93.3	93.3	93.3	93.4	93.4	93.4	93.3	75.7
R.microplus|Mexico 9	99.8	99.8	99.8	99.8	99.8	99.8	99.8	99.8	99.8	99.8	99.8	99.8	99.8	99.8	99.8	99.8	99.8	99.7	99.7	100	100	100	100	100	100	100	100	100		100	100	100	100	99.7	99.8	93.3	93.3	93.3	93.3	93.4	93.4	93.4	93.3	75.7
R.microplus|Colombia 1	99.8	99.8	99.8	99.8	99.8	99.8	99.8	99.8	99.8	99.8	99.8	99.8	99.8	99.8	99.8	99.8	99.8	99.7	99.7	100	100	100	100	100	100	100	100	100	100		100	100	100	99.7	99.8	93.3	93.3	93.3	93.3	93.4	93.4	93.4	93.3	75.7
R.microplus|Panama 1	99.8	99.8	99.8	99.8	99.8	99.8	99.8	99.8	99.8	99.8	99.8	99.8	99.8	99.8	99.8	99.8	99.8	99.7	99.7	100	100	100	100	100	100	100	100	100	100	100		100	100	99.7	99.8	93.3	93.3	93.3	93.3	93.4	93.4	93.4	93.3	75.7
R.microplus|Panama 2	99.8	99.8	99.8	99.8	99.8	99.8	99.8	99.8	99.8	99.8	99.8	99.8	99.8	99.8	99.8	99.8	99.8	99.7	99.7	100	100	100	100	100	100	100	100	100	100	100	100		100	99.7	99.8	93.3	93.3	93.3	93.3	93.4	93.4	93.4	93.3	75.7
R.microplus|Panama 3	99.8	99.8	99.8	99.8	99.8	99.8	99.8	99.8	99.8	99.8	99.8	99.8	99.8	99.8	99.8	99.8	99.8	99.7	99.7	100	100	100	100	100	100	100	100	100	100	100	100	100		99.7	99.8	93.3	93.3	93.3	93.3	93.4	93.4	93.4	93.3	75.7
R.microplus|Brazil 14	99.8	99.8	99.8	99.8	99.8	99.8	99.8	99.8	99.8	99.8	99.8	99.8	99.8	99.8	99.8	99.8	99.8	99.7	99.7	99.7	99.7	99.7	99.7	99.7	99.7	99.7	99.7	99.7	99.7	99.7	99.7	99.7	99.7		99.5	93.3	93.3	93.3	93.3	93.4	93.4	93.4	93.3	75.6
R.microplus|Colombia 2	99.7	99.7	99.7	99.7	99.7	99.7	99.7	99.7	99.7	99.7	99.7	99.7	99.7	99.7	99.7	99.7	99.7	99.5	99.7	99.8	99.8	99.8	99.8	99.8	99.8	99.8	99.8	99.8	99.8	99.8	99.8	99.8	99.8	99.5		93.1	93.1	93.1	93.1	93.3	93.3	93.3	93.1	75.9
R.annulatus|Mexico 10	93.4	93.4	93.4	93.4	93.4	93.4	93.4	93.4	93.4	93.4	93.4	93.4	93.4	93.4	93.4	93.4	93.4	93.3	93.3	93.3	93.3	93.3	93.3	93.3	93.3	93.3	93.3	93.3	93.3	93.3	93.3	93.3	93.3	93.3	93.1		100	100	99.9	99.7	99.7	99.7	99.5	76.8
R.annulatus|Mexico 11	93.4	93.4	93.4	93.4	93.4	93.4	93.4	93.4	93.4	93.4	93.4	93.4	93.4	93.4	93.4	93.4	93.4	93.3	93.3	93.3	93.3	93.3	93.3	93.3	93.3	93.3	93.3	93.3	93.3	93.3	93.3	93.3	93.3	93.3	93.1	100		100	99.9	99.7	99.7	99.7	99.5	76.8
R.annulatus|Mexico 12	93.4	93.4	93.4	93.4	93.4	93.4	93.4	93.4	93.4	93.4	93.4	93.4	93.4	93.4	93.4	93.4	93.4	93.3	93.3	93.3	93.3	93.3	93.3	93.3	93.3	93.3	93.3	93.3	93.3	93.3	93.3	93.3	93.3	93.3	93.1	100	100		99.9	99.7	99.7	99.7	99.5	76.8
R.annulatus|Mexico 13	93.5	93.5	93.5	93.5	93.5	93.5	93.5	93.5	93.5	93.5	93.5	93.5	93.5	93.5	93.5	93.5	93.5	93.3	93.3	93.3	93.3	93.3	93.3	93.3	93.3	93.3	93.3	93.3	93.3	93.3	93.3	93.3	93.3	93.3	93.1	99.9	99.9	99.9		99.5	99.5	99.5	99.4	76.8
R.annulatus|Mexico 14	93.6	93.6	93.6	93.6	93.6	93.6	93.6	93.6	93.6	93.6	93.6	93.6	93.6	93.6	93.6	93.6	93.6	93.4	93.4	93.4	93.4	93.4	93.4	93.4	93.4	93.4	93.4	93.4	93.4	93.4	93.4	93.4	93.4	93.4	93.3	99.7	99.7	99.7	99.5		100	100	99.8	77.2
R.annulatus|Mexico 15	93.6	93.6	93.6	93.6	93.6	93.6	93.6	93.6	93.6	93.6	93.6	93.6	93.6	93.6	93.6	93.6	93.6	93.4	93.4	93.4	93.4	93.4	93.4	93.4	93.4	93.4	93.4	93.4	93.4	93.4	93.4	93.4	93.4	93.4	93.3	99.7	99.7	99.7	99.5	100		100	99.8	77.2
R.annulatus|Mexico 16	93.6	93.6	93.6	93.6	93.6	93.6	93.6	93.6	93.6	93.6	93.6	93.6	93.6	93.6	93.6	93.6	93.6	93.4	93.4	93.4	93.4	93.4	93.4	93.4	93.4	93.4	93.4	93.4	93.4	93.4	93.4	93.4	93.4	93.4	93.3	99.7	99.7	99.7	99.5	100	100		99.8	77.2
R.annulatus|Mexico 17	93.4	93.4	93.4	93.4	93.4	93.4	93.4	93.4	93.4	93.4	93.4	93.4	93.4	93.4	93.4	93.4	93.4	93.3	93.3	93.3	93.3	93.3	93.3	93.3	93.3	93.3	93.3	93.3	93.3	93.3	93.3	93.3	93.3	93.3	93.1	99.5	99.5	99.5	99.4	99.8	99.8	99.8		77.2
I.ricinus|Switzerland	75.7	75.7	75.7	75.7	75.7	75.7	75.7	75.7	75.7	75.7	75.7	75.7	75.7	75.7	75.7	75.7	75.7	75.5	75.7	75.7	75.7	75.7	75.7	75.7	75.7	75.7	75.7	75.7	75.7	75.7	75.7	75.7	75.7	75.6	75.9	76.8	76.8	76.8	76.8	77.2	77.2	77.2	77.2

## Sheet: % identities 16S 
Table S5. Distance matrix showing the genetic distances between each pair of sequences (% Identity) construted with the aligment of 16S partial sequences from the Neartic-Neotropic
	I.ricinus|Sweden	R.annulatus|Mexico 10	R.annulatus|Mexico 11	R.annulatus|Mexico 12	R.annulatus|Mexico 13	R.annulatus|Mexico 14	R.annulatus|Mexico 17	R.microplus|Argentina 1	R.microplus|Argentina 2	R.microplus|Argentina 3	R.microplus|Argentina 4	R.microplus|Argentina 5	R.microplus|Brazil 1	R.microplus|Brazil 3	R.microplus|Brazil 4	R.microplus|Brazil 5	R.microplus|Brazil 6	R.microplus|Brazil 7	R.microplus|Brazil 9	R.microplus|Brazil 13	R.microplus|Argentina 6	R.microplus|Bolivia 1	R.microplus|Brazil 14	R.microplus|Colombia 8	R.microplus|Colombia 9	R.microplus|Colombia 10	R.microplus|Colombia 11	R.microplus|Costa Rica 1	R.microplus|Mexico 1	R.microplus|Mexico 2	R.microplus|Mexico 3	R.microplus|Mexico 4	R.microplus|Mexico 5	R.microplus|Mexico 6	R.microplus|Mexico 7	R.microplus|Mexico 8	R.microplus|Mexico 9	R.microplus|Paraguay 1	R.microplus|Peru 1	R.microplus|Uruguay 1	R.microplus|Uruguay 2	R.microplus|Uruguay 3	R.microplus|Colombia 5	R.microplus|Colombia 2	R.microplus|Colombia 3	R.microplus|Colombia 4	R.microplus|Colombia 6	R.microplus|Colombia 7	R.microplus|Colombia 1
I.ricinus|Sweden		77506	77506	77506	77506	77751	77751	76528	76528	76528	76528	76528	76528	76528	76528	76528	76528	76528	76528	76528	76355	76355	76355	76355	76355	76355	76355	76355	76355	76355	76355	76355	76355	76355	76355	76355	76355	76355	76355	76355	76355	76355	74317	75573	75573	75573	75573	75573	72575
R.annulatus|Mexico 10	77506		100000	100000	100000	99502	99502	97015	97015	97015	97015	97015	97015	97015	97015	97015	97015	97015	97015	97015	96992	96992	96992	96992	96992	96992	96992	96992	96992	96992	96992	96992	96992	96992	96992	96992	96992	96992	96992	96992	96992	96992	96379	96632	96632	96632	96632	96632	95205
R.annulatus|Mexico 11	77506	100000		100000	100000	99502	99502	97015	97015	97015	97015	97015	97015	97015	97015	97015	97015	97015	97015	97015	96992	96992	96992	96992	96992	96992	96992	96992	96992	96992	96992	96992	96992	96992	96992	96992	96992	96992	96992	96992	96992	96992	96379	96632	96632	96632	96632	96632	95205
R.annulatus|Mexico 12	77506	100000	100000		100000	99502	99502	97015	97015	97015	97015	97015	97015	97015	97015	97015	97015	97015	97015	97015	96992	96992	96992	96992	96992	96992	96992	96992	96992	96992	96992	96992	96992	96992	96992	96992	96992	96992	96992	96992	96992	96992	96379	96632	96632	96632	96632	96632	95205
R.annulatus|Mexico 13	77506	100000	100000	100000		99502	99502	97015	97015	97015	97015	97015	97015	97015	97015	97015	97015	97015	97015	97015	96992	96992	96992	96992	96992	96992	96992	96992	96992	96992	96992	96992	96992	96992	96992	96992	96992	96992	96992	96992	96992	96992	96379	96632	96632	96632	96632	96632	95205
R.annulatus|Mexico 14	77751	99502	99502	99502	99502		100000	97264	97264	97264	97264	97264	97264	97264	97264	97264	97264	97264	97264	97264	97243	97243	97243	97243	97243	97243	97243	97243	97243	97243	97243	97243	97243	97243	97243	97243	97243	97243	97243	97243	97243	97243	96657	96891	96891	96891	96891	96891	95548
R.annulatus|Mexico 17	77751	99502	99502	99502	99502	100000		97264	97264	97264	97264	97264	97264	97264	97264	97264	97264	97264	97264	97264	97243	97243	97243	97243	97243	97243	97243	97243	97243	97243	97243	97243	97243	97243	97243	97243	97243	97243	97243	97243	97243	97243	96657	96891	96891	96891	96891	96891	95548
R.microplus|Argentina 1	76528	97015	97015	97015	97015	97264	97264		100000	100000	100000	100000	100000	100000	100000	100000	100000	100000	100000	100000	100000	100000	100000	100000	100000	100000	100000	100000	100000	100000	100000	100000	100000	100000	100000	100000	100000	100000	100000	100000	100000	100000	99721	99741	99741	99741	99741	99741	99315
R.microplus|Argentina 2	76528	97015	97015	97015	97015	97264	97264	100000		100000	100000	100000	100000	100000	100000	100000	100000	100000	100000	100000	100000	100000	100000	100000	100000	100000	100000	100000	100000	100000	100000	100000	100000	100000	100000	100000	100000	100000	100000	100000	100000	100000	99721	99741	99741	99741	99741	99741	99315
R.microplus|Argentina 3	76528	97015	97015	97015	97015	97264	97264	100000	100000		100000	100000	100000	100000	100000	100000	100000	100000	100000	100000	100000	100000	100000	100000	100000	100000	100000	100000	100000	100000	100000	100000	100000	100000	100000	100000	100000	100000	100000	100000	100000	100000	99721	99741	99741	99741	99741	99741	99315
R.microplus|Argentina 4	76528	97015	97015	97015	97015	97264	97264	100000	100000	100000		100000	100000	100000	100000	100000	100000	100000	100000	100000	100000	100000	100000	100000	100000	100000	100000	100000	100000	100000	100000	100000	100000	100000	100000	100000	100000	100000	100000	100000	100000	100000	99721	99741	99741	99741	99741	99741	99315
R.microplus|Argentina 5	76528	97015	97015	97015	97015	97264	97264	100000	100000	100000	100000		100000	100000	100000	100000	100000	100000	100000	100000	100000	100000	100000	100000	100000	100000	100000	100000	100000	100000	100000	100000	100000	100000	100000	100000	100000	100000	100000	100000	100000	100000	99721	99741	99741	99741	99741	99741	99315
R.microplus|Brazil 1	76528	97015	97015	97015	97015	97264	97264	100000	100000	100000	100000	100000		100000	100000	100000	100000	100000	100000	100000	100000	100000	100000	100000	100000	100000	100000	100000	100000	100000	100000	100000	100000	100000	100000	100000	100000	100000	100000	100000	100000	100000	99721	99741	99741	99741	99741	99741	99315
R.microplus|Brazil 3	76528	97015	97015	97015	97015	97264	97264	100000	100000	100000	100000	100000	100000		100000	100000	100000	100000	100000	100000	100000	100000	100000	100000	100000	100000	100000	100000	100000	100000	100000	100000	100000	100000	100000	100000	100000	100000	100000	100000	100000	100000	99721	99741	99741	99741	99741	99741	99315
R.microplus|Brazil 4	76528	97015	97015	97015	97015	97264	97264	100000	100000	100000	100000	100000	100000	100000		100000	100000	100000	100000	100000	100000	100000	100000	100000	100000	100000	100000	100000	100000	100000	100000	100000	100000	100000	100000	100000	100000	100000	100000	100000	100000	100000	99721	99741	99741	99741	99741	99741	99315
R.microplus|Brazil 5	76528	97015	97015	97015	97015	97264	97264	100000	100000	100000	100000	100000	100000	100000	100000		100000	100000	100000	100000	100000	100000	100000	100000	100000	100000	100000	100000	100000	100000	100000	100000	100000	100000	100000	100000	100000	100000	100000	100000	100000	100000	99721	99741	99741	99741	99741	99741	99315
R.microplus|Brazil 6	76528	97015	97015	97015	97015	97264	97264	100000	100000	100000	100000	100000	100000	100000	100000	100000		100000	100000	100000	100000	100000	100000	100000	100000	100000	100000	100000	100000	100000	100000	100000	100000	100000	100000	100000	100000	100000	100000	100000	100000	100000	99721	99741	99741	99741	99741	99741	99315
R.microplus|Brazil 7	76528	97015	97015	97015	97015	97264	97264	100000	100000	100000	100000	100000	100000	100000	100000	100000	100000		100000	100000	100000	100000	100000	100000	100000	100000	100000	100000	100000	100000	100000	100000	100000	100000	100000	100000	100000	100000	100000	100000	100000	100000	99721	99741	99741	99741	99741	99741	99315
R.microplus|Brazil 9	76528	97015	97015	97015	97015	97264	97264	100000	100000	100000	100000	100000	100000	100000	100000	100000	100000	100000		100000	100000	100000	100000	100000	100000	100000	100000	100000	100000	100000	100000	100000	100000	100000	100000	100000	100000	100000	100000	100000	100000	100000	99721	99741	99741	99741	99741	99741	99315
R.microplus|Brazil 13	76528	97015	97015	97015	97015	97264	97264	100000	100000	100000	100000	100000	100000	100000	100000	100000	100000	100000	100000		100000	100000	100000	100000	100000	100000	100000	100000	100000	100000	100000	100000	100000	100000	100000	100000	100000	100000	100000	100000	100000	100000	99721	99741	99741	99741	99741	99741	99315
R.microplus|Argentina 6	76355	96992	96992	96992	96992	97243	97243	100000	100000	100000	100000	100000	100000	100000	100000	100000	100000	100000	100000	100000		100000	100000	100000	100000	100000	100000	100000	100000	100000	100000	100000	100000	100000	100000	100000	100000	100000	100000	100000	100000	100000	99721	99741	99741	99741	99741	99741	99315
R.microplus|Bolivia 1	76355	96992	96992	96992	96992	97243	97243	100000	100000	100000	100000	100000	100000	100000	100000	100000	100000	100000	100000	100000	100000		100000	100000	100000	100000	100000	100000	100000	100000	100000	100000	100000	100000	100000	100000	100000	100000	100000	100000	100000	100000	99721	99741	99741	99741	99741	99741	99315
R.microplus|Brazil 14	76355	96992	96992	96992	96992	97243	97243	100000	100000	100000	100000	100000	100000	100000	100000	100000	100000	100000	100000	100000	100000	100000		100000	100000	100000	100000	100000	100000	100000	100000	100000	100000	100000	100000	100000	100000	100000	100000	100000	100000	100000	99721	99741	99741	99741	99741	99741	99315
R.microplus|Colombia 8	76355	96992	96992	96992	96992	97243	97243	100000	100000	100000	100000	100000	100000	100000	100000	100000	100000	100000	100000	100000	100000	100000	100000		100000	100000	100000	100000	100000	100000	100000	100000	100000	100000	100000	100000	100000	100000	100000	100000	100000	100000	99721	99741	99741	99741	99741	99741	99315
R.microplus|Colombia 9	76355	96992	96992	96992	96992	97243	97243	100000	100000	100000	100000	100000	100000	100000	100000	100000	100000	100000	100000	100000	100000	100000	100000	100000		100000	100000	100000	100000	100000	100000	100000	100000	100000	100000	100000	100000	100000	100000	100000	100000	100000	99721	99741	99741	99741	99741	99741	99315
R.microplus|Colombia 10	76355	96992	96992	96992	96992	97243	97243	100000	100000	100000	100000	100000	100000	100000	100000	100000	100000	100000	100000	100000	100000	100000	100000	100000	100000		100000	100000	100000	100000	100000	100000	100000	100000	100000	100000	100000	100000	100000	100000	100000	100000	99721	99741	99741	99741	99741	99741	99315
R.microplus|Colombia 11	76355	96992	96992	96992	96992	97243	97243	100000	100000	100000	100000	100000	100000	100000	100000	100000	100000	100000	100000	100000	100000	100000	100000	100000	100000	100000		100000	100000	100000	100000	100000	100000	100000	100000	100000	100000	100000	100000	100000	100000	100000	99721	99741	99741	99741	99741	99741	99315
R.microplus|Costa Rica 1	76355	96992	96992	96992	96992	97243	97243	100000	100000	100000	100000	100000	100000	100000	100000	100000	100000	100000	100000	100000	100000	100000	100000	100000	100000	100000	100000		100000	100000	100000	100000	100000	100000	100000	100000	100000	100000	100000	100000	100000	100000	99721	99741	99741	99741	99741	99741	99315
R.microplus|Mexico 1	76355	96992	96992	96992	96992	97243	97243	100000	100000	100000	100000	100000	100000	100000	100000	100000	100000	100000	100000	100000	100000	100000	100000	100000	100000	100000	100000	100000		100000	100000	100000	100000	100000	100000	100000	100000	100000	100000	100000	100000	100000	99721	99741	99741	99741	99741	99741	99315
R.microplus|Mexico 2	76355	96992	96992	96992	96992	97243	97243	100000	100000	100000	100000	100000	100000	100000	100000	100000	100000	100000	100000	100000	100000	100000	100000	100000	100000	100000	100000	100000	100000		100000	100000	100000	100000	100000	100000	100000	100000	100000	100000	100000	100000	99721	99741	99741	99741	99741	99741	99315
R.microplus|Mexico 3	76355	96992	96992	96992	96992	97243	97243	100000	100000	100000	100000	100000	100000	100000	100000	100000	100000	100000	100000	100000	100000	100000	100000	100000	100000	100000	100000	100000	100000	100000		100000	100000	100000	100000	100000	100000	100000	100000	100000	100000	100000	99721	99741	99741	99741	99741	99741	99315
R.microplus|Mexico 4	76355	96992	96992	96992	96992	97243	97243	100000	100000	100000	100000	100000	100000	100000	100000	100000	100000	100000	100000	100000	100000	100000	100000	100000	100000	100000	100000	100000	100000	100000	100000		100000	100000	100000	100000	100000	100000	100000	100000	100000	100000	99721	99741	99741	99741	99741	99741	99315
R.microplus|Mexico 5	76355	96992	96992	96992	96992	97243	97243	100000	100000	100000	100000	100000	100000	100000	100000	100000	100000	100000	100000	100000	100000	100000	100000	100000	100000	100000	100000	100000	100000	100000	100000	100000		100000	100000	100000	100000	100000	100000	100000	100000	100000	99721	99741	99741	99741	99741	99741	99315
R.microplus|Mexico 6	76355	96992	96992	96992	96992	97243	97243	100000	100000	100000	100000	100000	100000	100000	100000	100000	100000	100000	100000	100000	100000	100000	100000	100000	100000	100000	100000	100000	100000	100000	100000	100000	100000		100000	100000	100000	100000	100000	100000	100000	100000	99721	99741	99741	99741	99741	99741	99315
R.microplus|Mexico 7	76355	96992	96992	96992	96992	97243	97243	100000	100000	100000	100000	100000	100000	100000	100000	100000	100000	100000	100000	100000	100000	100000	100000	100000	100000	100000	100000	100000	100000	100000	100000	100000	100000	100000		100000	100000	100000	100000	100000	100000	100000	99721	99741	99741	99741	99741	99741	99315
R.microplus|Mexico 8	76355	96992	96992	96992	96992	97243	97243	100000	100000	100000	100000	100000	100000	100000	100000	100000	100000	100000	100000	100000	100000	100000	100000	100000	100000	100000	100000	100000	100000	100000	100000	100000	100000	100000	100000		100000	100000	100000	100000	100000	100000	99721	99741	99741	99741	99741	99741	99315
R.microplus|Mexico 9	76355	96992	96992	96992	96992	97243	97243	100000	100000	100000	100000	100000	100000	100000	100000	100000	100000	100000	100000	100000	100000	100000	100000	100000	100000	100000	100000	100000	100000	100000	100000	100000	100000	100000	100000	100000		100000	100000	100000	100000	100000	99721	99741	99741	99741	99741	99741	99315
R.microplus|Paraguay 1	76355	96992	96992	96992	96992	97243	97243	100000	100000	100000	100000	100000	100000	100000	100000	100000	100000	100000	100000	100000	100000	100000	100000	100000	100000	100000	100000	100000	100000	100000	100000	100000	100000	100000	100000	100000	100000		100000	100000	100000	100000	99721	99741	99741	99741	99741	99741	99315
R.microplus|Peru 1	76355	96992	96992	96992	96992	97243	97243	100000	100000	100000	100000	100000	100000	100000	100000	100000	100000	100000	100000	100000	100000	100000	100000	100000	100000	100000	100000	100000	100000	100000	100000	100000	100000	100000	100000	100000	100000	100000		100000	100000	100000	99721	99741	99741	99741	99741	99741	99315
R.microplus|Uruguay 1	76355	96992	96992	96992	96992	97243	97243	100000	100000	100000	100000	100000	100000	100000	100000	100000	100000	100000	100000	100000	100000	100000	100000	100000	100000	100000	100000	100000	100000	100000	100000	100000	100000	100000	100000	100000	100000	100000	100000		100000	100000	99721	99741	99741	99741	99741	99741	99315
R.microplus|Uruguay 2	76355	96992	96992	96992	96992	97243	97243	100000	100000	100000	100000	100000	100000	100000	100000	100000	100000	100000	100000	100000	100000	100000	100000	100000	100000	100000	100000	100000	100000	100000	100000	100000	100000	100000	100000	100000	100000	100000	100000	100000		100000	99721	99741	99741	99741	99741	99741	99315
R.microplus|Uruguay 3	76355	96992	96992	96992	96992	97243	97243	100000	100000	100000	100000	100000	100000	100000	100000	100000	100000	100000	100000	100000	100000	100000	100000	100000	100000	100000	100000	100000	100000	100000	100000	100000	100000	100000	100000	100000	100000	100000	100000	100000	100000		99721	99741	99741	99741	99741	99741	99315
R.microplus|Colombia 5	74317	96379	96379	96379	96379	96657	96657	99721	99721	99721	99721	99721	99721	99721	99721	99721	99721	99721	99721	99721	99721	99721	99721	99721	99721	99721	99721	99721	99721	99721	99721	99721	99721	99721	99721	99721	99721	99721	99721	99721	99721	99721		99721	99721	99721	99721	99721	98810
R.microplus|Colombia 2	75573	96632	96632	96632	96632	96891	96891	99741	99741	99741	99741	99741	99741	99741	99741	99741	99741	99741	99741	99741	99741	99741	99741	99741	99741	99741	99741	99741	99741	99741	99741	99741	99741	99741	99741	99741	99741	99741	99741	99741	99741	99741	99721		100000	100000	100000	100000	98925
R.microplus|Colombia 3	75573	96632	96632	96632	96632	96891	96891	99741	99741	99741	99741	99741	99741	99741	99741	99741	99741	99741	99741	99741	99741	99741	99741	99741	99741	99741	99741	99741	99741	99741	99741	99741	99741	99741	99741	99741	99741	99741	99741	99741	99741	99741	99721	100000		100000	100000	100000	98925
R.microplus|Colombia 4	75573	96632	96632	96632	96632	96891	96891	99741	99741	99741	99741	99741	99741	99741	99741	99741	99741	99741	99741	99741	99741	99741	99741	99741	99741	99741	99741	99741	99741	99741	99741	99741	99741	99741	99741	99741	99741	99741	99741	99741	99741	99741	99721	100000	100000		100000	100000	98925
R.microplus|Colombia 6	75573	96632	96632	96632	96632	96891	96891	99741	99741	99741	99741	99741	99741	99741	99741	99741	99741	99741	99741	99741	99741	99741	99741	99741	99741	99741	99741	99741	99741	99741	99741	99741	99741	99741	99741	99741	99741	99741	99741	99741	99741	99741	99721	100000	100000	100000		100000	98925
R.microplus|Colombia 7	75573	96632	96632	96632	96632	96891	96891	99741	99741	99741	99741	99741	99741	99741	99741	99741	99741	99741	99741	99741	99741	99741	99741	99741	99741	99741	99741	99741	99741	99741	99741	99741	99741	99741	99741	99741	99741	99741	99741	99741	99741	99741	99721	100000	100000	100000	100000		98925
R.microplus|Colombia 1	72575	95205	95205	95205	95205	95548	95548	99315	99315	99315	99315	99315	99315	99315	99315	99315	99315	99315	99315	99315	99315	99315	99315	99315	99315	99315	99315	99315	99315	99315	99315	99315	99315	99315	99315	99315	99315	99315	99315	99315	99315	99315	98810	98925	98925	98925	98925	98925

## Sheet: % Identities ITS2
Table S6. Distance matrix showing the genetic distances between each pair of sequences (% Identity) construted with the aligment of ITS2 sequences from the Neartic-Neotropic
	B.microplus|Brazil 15	R.annulatus|Mexico 11	R.microplus|Argentina 2	R.microplus|Argentina 3	R.microplus|Argentina 5	R.microplus|Brazil 13	R.microplus|Mexico 1	R.microplus|Mexico 2	R.microplus|Mexico 3	R.microplus|Mexico 4	R.microplus|Mexico 5	R.microplus|Mexico 6	R.microplus|Mexico 7	R.microplus|Mexico 8	R.microplus|Mexico 12	R.microplus|Brazil 5	R.microplus|Argentina 4	R.microplus|Brazil 1	R.microplus|Brazil 2	R.microplus|Uruguay 2	R.microplus|Brazil 4	R.microplus|Brazil 9	R.microplus|Brazil 6	R.microplus|Mexico 9	R.microplus|Brazil 14	R.microplus|Colombia 1	I.ricinus|Russia
B.microplus|Brazil 15		98421	99513	99513	99513	99513	99513	99513	99513	99513	99513	99513	99513	99513	99102	99513	99351	99472	99554	99391	99391	99432	99310	99290	99513	91639	31220
R.annulatus|Mexico 11	98421		98907	98907	98907	98907	98907	98907	98907	98907	98907	98907	98907	98907	98952	98907	98745	98907	98866	98785	98866	98866	98785	98684	98907	91169	31345
R.microplus|Argentina 2	99513	98907		100000	100000	100000	100000	100000	100000	100000	100000	100000	100000	100000	100000	100000	99838	99959	99959	99878	99878	99919	99797	99777	100000	92131	31461
R.microplus|Argentina 3	99513	98907	100000		100000	100000	100000	100000	100000	100000	100000	100000	100000	100000	100000	100000	99838	99959	99959	99878	99878	99919	99797	99777	100000	92131	31461
R.microplus|Argentina 5	99513	98907	100000	100000		100000	100000	100000	100000	100000	100000	100000	100000	100000	100000	100000	99838	99959	99959	99878	99878	99919	99797	99777	100000	92131	31461
R.microplus|Brazil 13	99513	98907	100000	100000	100000		100000	100000	100000	100000	100000	100000	100000	100000	100000	100000	99838	99959	99959	99878	99878	99919	99797	99777	100000	92131	31461
R.microplus|Mexico 1	99513	98907	100000	100000	100000	100000		100000	100000	100000	100000	100000	100000	100000	100000	100000	99838	99959	99959	99878	99878	99919	99797	99777	100000	92131	31461
R.microplus|Mexico 2	99513	98907	100000	100000	100000	100000	100000		100000	100000	100000	100000	100000	100000	100000	100000	99838	99959	99959	99878	99878	99919	99797	99777	100000	92131	31461
R.microplus|Mexico 3	99513	98907	100000	100000	100000	100000	100000	100000		100000	100000	100000	100000	100000	100000	100000	99838	99959	99959	99878	99878	99919	99797	99777	100000	92131	31461
R.microplus|Mexico 4	99513	98907	100000	100000	100000	100000	100000	100000	100000		100000	100000	100000	100000	100000	100000	99838	99959	99959	99878	99878	99919	99797	99777	100000	92131	31461
R.microplus|Mexico 5	99513	98907	100000	100000	100000	100000	100000	100000	100000	100000		100000	100000	100000	100000	100000	99838	99959	99959	99878	99878	99919	99797	99777	100000	92131	31461
R.microplus|Mexico 6	99513	98907	100000	100000	100000	100000	100000	100000	100000	100000	100000		100000	100000	100000	100000	99838	99959	99959	99878	99878	99919	99797	99777	100000	92131	31461
R.microplus|Mexico 7	99513	98907	100000	100000	100000	100000	100000	100000	100000	100000	100000	100000		100000	100000	100000	99838	99959	99959	99878	99878	99919	99797	99777	100000	92131	31461
R.microplus|Mexico 8	99513	98907	100000	100000	100000	100000	100000	100000	100000	100000	100000	100000	100000		100000	100000	99838	99959	99959	99878	99878	99919	99797	99777	100000	92131	31461
R.microplus|Mexico 12	99102	98952	100000	100000	100000	100000	100000	100000	100000	100000	100000	100000	100000	100000		100000	100000	99925	99925	99775	99850	99925	99850	100000	100000	98204	18413
R.microplus|Brazil 5	99513	98907	100000	100000	100000	100000	100000	100000	100000	100000	100000	100000	100000	100000	100000		99838	99959	99959	99878	99878	99919	99797	99777	100000	92131	31461
R.microplus|Argentina 4	99351	98745	99838	99838	99838	99838	99838	99838	99838	99838	99838	99838	99838	99838	100000	99838		99797	99797	99716	99716	99756	99635	99614	99838	92282	31300
R.microplus|Brazil 1	99472	98907	99959	99959	99959	99959	99959	99959	99959	99959	99959	99959	99959	99959	99925	99959	99797		99919	99838	99878	99878	99797	99736	99959	92131	31461
R.microplus|Brazil 2	99554	98866	99959	99959	99959	99959	99959	99959	99959	99959	99959	99959	99959	99959	99925	99959	99797	99919		99838	99838	99878	99756	99736	99959	92090	31461
R.microplus|Uruguay 2	99391	98785	99878	99878	99878	99878	99878	99878	99878	99878	99878	99878	99878	99878	99775	99878	99716	99838	99838		99756	99797	99675	99655	99878	92254	31380
R.microplus|Brazil 4	99391	98866	99878	99878	99878	99878	99878	99878	99878	99878	99878	99878	99878	99878	99850	99878	99716	99878	99838	99756		99878	99756	99655	99878	92131	31461
R.microplus|Brazil 9	99432	98866	99919	99919	99919	99919	99919	99919	99919	99919	99919	99919	99919	99919	99925	99919	99756	99878	99878	99797	99878		99756	99696	99919	92131	31461
R.microplus|Brazil 6	99310	98785	99797	99797	99797	99797	99797	99797	99797	99797	99797	99797	99797	99797	99850	99797	99635	99797	99756	99675	99756	99756		99574	99797	92049	31421
R.microplus|Mexico 9	99290	98684	99777	99777	99777	99777	99777	99777	99777	99777	99777	99777	99777	99777	100000	99777	99614	99736	99736	99655	99655	99696	99574		99777	91906	31320
R.microplus|Brazil 14	99513	98907	100000	100000	100000	100000	100000	100000	100000	100000	100000	100000	100000	100000	100000	100000	99838	99959	99959	99878	99878	99919	99797	99777		92131	31461
R.microplus|Colombia 1	91639	91169	92131	92131	92131	92131	92131	92131	92131	92131	92131	92131	92131	92131	98204	92131	92282	92131	92090	92254	92131	92131	92049	91906	92131		26579
I.ricinus|Russia	31220	31345	31461	31461	31461	31461	31461	31461	31461	31461	31461	31461	31461	31461	18413	31461	31300	31461	31461	31380	31461	31461	31421	31320	31461	26579

## Sheet: Environmental similarities
Table S7. Distance matrix showing the distances among the environemntally-derived clusters in the Neartic-Neotropics.
	BC1	BC2	BC3	BC4	BC5	BC6	BC7	BC8	BC9	BC10	BC11	BC12	BC13	BC14	BC15	BC16	BC17	BC18	BC19	BC20
BC1		38	58	59	26	35	71	95	0	26	41	96	93	0	40	98	19	38	70	0
BC2	38		52	62	12	61	54	55	53	85	85	55	65	55	21	5	25	6	46	47
BC3	58	52		7	100	13	76	69	17	100	85	89	31	31	36	29	60	7	46	48
BC4	59	62	7		77	51	88	92	74	3	83	18	6	62	66	70	21	74	67	22
BC5	26	12	100	77		26	22	94	39	80	55	48	80	87	25	19	24	47	62	84
BC6	35	61	13	51	26		55	40	9	28	35	11	67	35	10	64	72	19	11	22
BC7	71	54	76	88	22	55		44	12	60	70	57	77	28	38	71	55	49	82	25
BC8	95	55	69	92	94	40	44		2	81	44	1	11	90	92	28	71	36	0	43
BC9	0	53	17	74	39	9	12	2		23	87	55	29	0	5	67	37	80	16	6
BC10	26	85	100	3	80	28	60	81	23		71	42	90	66	59	84	71	73	87	22
BC11	41	85	85	83	55	35	70	44	87	71		35	95	95	11	33	31	4	81	25
BC12	96	55	89	18	48	11	57	1	55	42	35		18	22	82	10	66	40	47	31
BC13	93	65	31	6	80	67	77	11	29	90	95	18		2	71	77	96	36	35	56
BC14	0	55	31	62	87	35	28	90	0	66	95	22	2		86	54	63	77	9	1
BC15	40	21	36	66	25	10	38	92	5	59	11	82	71	86		22	52	93	45	34
BC16	98	5	29	70	19	64	71	28	67	84	33	10	77	54	22		0	84	81	85
BC17	19	25	60	21	24	72	55	71	37	71	31	66	96	63	52	0		90	38	98
BC18	38	6	7	74	47	19	49	36	80	73	4	40	36	77	93	84	90		99	9
BC19	70	46	46	67	62	11	82	0	16	87	81	47	35	9	45	81	38	99		39
BC20	0	47	48	22	84	22	25	43	6	22	25	31	56	1	34	85	98	9	39

## Sheet: Distance (kilometers)
Table S8. Matrix showin the distance in kilometers (straight line) among the samples in the Nearctic-Neotropics.
	Brazil 1	Brazil 2	Brazil 3	Brazil 4	Panama 1	Panama 2	Panama 3	Colombia 1	Colombia 2	Mexico 1	Mexico 2	Mexico 3	Mexico 4	Mexico 5	Mexico 6	Mexico 7	Mexico 8	Mexico 9	Mexico 10	Mexico 11	Mexico 12	Mexico 13	Mexico 14	Mexico 15	Mexico 16	Mexico 17	Argentina 1	Argentina 2	Argentina 3	Argentina 4	Argentina 5	Brazil 5	Brazil 6	Brazil 7	Brazil 8	Brazil 9	Brazil 10	Brazil 11	Brazil 12	Brazil 13	Brazil 14
Brazil 1
Brazil 2	1710.49
Brazil 3	1298.89	2958.35
Brazil 4	1308.77	1557.17	2450.88
Panama 1	3560.73	2261.04	4844.17	2498.11
Panama 2	3688	2516	5112	2612	89
Panama 3	3565.74	2279.23	4847.36	2494.03	34.514	27.6112
Colombia 1	3154.63	1768.82	4450.17	2201.01	503.16	402.528	526.906
Colombia 2	3215.78	1816.48	4511.78	2265.03	470.452	376.362	496.852	1204
Mexico 1	6354.78	5094.22	7599.66	5158.33	2849.12	2279.29	2836.03	3327.42	3278.07
Mexico 2	5750.93	4610.15	10316.3	4668.17	2578.39	2062.71	2566.54	4516.85	4449.87	152
Mexico 3	5750.93	4610.15	6877.52	4668.17	2578.39	2062.71	2566.54	3011.24	4449.87	105	251
Mexico 4	5750.93	6915.23	10316.3	7002.26	2578.39	2062.71	3849.81	3011.24	4449.87	29	167	276
Mexico 5	8626.39	4610.15	10316.3	7002.26	3867.58	3094.06	2566.54	3011.24	4449.87	57	291	232	113
Mexico 6	8626.39	6915.23	6877.52	4668.17	3867.58	3094.06	3849.81	3011.24	2966.58	414	172	191	134	209
Mexico 7	8626.39	6915.23	6877.52	4668.17	3867.58	3094.06	2566.54	3011.24	4449.87	321	281	203	114	243	168
Mexico 8	8626.39	6915.23	10316.3	4668.17	3867.58	3094.06	2566.54	3011.24	2966.58	65	290	177	285	277	217	135
Mexico 9	5750.93	4610.15	6877.52	4668.17	3867.58	3094.06	3849.81	4516.85	2966.58	34	106	113	189	271	232	196	166
Mexico 10	8626.39	4610.15	6877.52	7002.26	3867.58	3094.06	3849.81	4516.85	4449.87	92	106	294	164	269	213	210	148	205
Mexico 11	5750.93	4610.15	6877.52	4668.17	3867.58	3094.06	3849.81	3011.24	4449.87	105	211	181	207	197	160	230	109	206	199
Mexico 12	5750.93	6915.23	6877.52	4668.17	2578.39	2062.71	2566.54	3011.24	4449.87	607	213	160	187	253	234	148	254	298	108	218
Mexico 13	8626.39	4610.15	6877.52	7002.26	2578.39	2062.71	2566.54	4516.85	2966.58	128	216	172	233	177	105	200	235	279	112	158	163
Mexico 14	5750.93	4610.15	8316.28	4668.17	3867.58	3094.06	3849.81	4516.85	4449.87	188	144	280	134	160	283	171	209	287	285	161	181	156
Mexico 15	5750.93	6915.23	6877.52	4668.17	2578.39	2062.71	3849.81	4516.85	4449.87	499	254	172	273	296	144	261	184	136	249	200	230	216	245
Mexico 16	8626.39	4610.15	6877.52	4668.17	3867.58	3094.06	3849.81	3011.24	2966.58	512	236	289	149	263	298	140	167	122	221	148	250	128	204	278
Mexico 17	8626.39	6915.23	6877.52	4668.17	2578.39	2062.71	3849.81	3011.24	2966.58	312	274	276	291	121	241	159	286	228	279	282	112	184	164	199	205
Argentina 1	1616.29	3207.99	1290.6	2049.03	4531.49	3625.19	4524.61	4249.93	4313.97	7035.91	5628.73	5628.73	5628.73	5628.73	5628.73	5628.73	5628.73	5628.73	5628.73	5628.73	5628.73	5628.73	5628.73	5628.73	5628.73	4502.98
Argentina 2	1716.93	3322.13	1304.77	2167.91	4648.58	3718.86	4641.5	4368.89	4432.92	7141.96	5713.56	5713.56	5713.56	5713.56	5713.56	5713.56	5713.56	5713.56	5713.56	5713.56	5713.56	5713.56	5713.56	5713.56	5713.56	4570.85	119.584
Argentina 3	2204.34	3811.4	1621.99	2607.91	5059.13	4047.3	5049.97	4804.22	4868.01	7459.81	5967.85	5967.85	5967.85	5967.85	5967.85	5967.85	5967.85	5967.85	5967.85	5967.85	5967.85	5967.85	5967.85	5967.85	5967.85	4774.28	603.484	491.667
Argentina 4	1731.22	3085.76	1828.53	1707.31	4098.65	3278.92	4087.94	3870.95	3934.11	6484.59	5187.67	5187.67	5187.67	5187.67	5187.67	5187.67	5187.67	5187.67	5187.67	5187.67	5187.67	5187.67	5187.67	5187.67	5187.67	4150.13	631.308	705.067	981.093
Argentina 5	1945.42	3393.56	1800.83	2052.11	4448.18	3558.55	4437.23	4221.34	4284.54	6805.57	5444.45	5444.45	5444.45	5444.45	5444.45	5444.45	5444.45	5444.45	5444.45	5444.45	5444.45	5444.45	5444.45	5444.45	5444.45	4355.56	511.313	525.467	655.358	350.628
Brazil 5	1664.96	3363.24	856.299	2430.55	4927.58	3942.06	4924.12	4602.81	4666.71	7526.72	6021.37	6021.37	6021.37	6021.37	6021.37	6021.37	6021.37	6021.37	6021.37	6021.37	6021.37	6021.37	6021.37	6021.37	6021.37	4817.1	586.764	540.136	766.291	1216.66	1064.98
Brazil 6	1190.12	2825.23	157.13	2385.91	4747.51	3798.01	4751.68	4344.72	4405.81	7520.39	6016.31	6016.31	6016.31	6016.31	6016.31	6016.31	6016.31	6016.31	6016.31	6016.31	6016.31	6016.31	6016.31	6016.31	6016.31	4813.05	1378.68	1404	1747.7	1884.96	1884.25	986.339
Brazil 7	1043.59	2673.88	294.248	2258.98	4603.27	3682.61	4607.81	4197.49	4258.41	7383.09	5906.47	5906.47	5906.47	5906.47	5906.47	5906.47	5906.47	5906.47	5906.47	5906.47	5906.47	5906.47	5906.47	5906.47	5906.47	4725.18	1391.35	1429.14	1803.99	1859.56	1887.43	1055.61	151.471
Brazil 8	1236.7	2862.89	155.018	2438.02	4795.48	3836.38	4799.83	4390.95	4451.91	7570.83	6056.66	6056.66	6056.66	6056.66	6056.66	6056.66	6056.66	6056.66	6056.66	6056.66	6056.66	6056.66	6056.66	6056.66	6056.66	4845.33	1414.15	1436.04	1769.34	1928.5	1921.41	1005.27	53.0318	193.718
Brazil 9	1158.28	2745.23	309.875	2399.96	4717.87	3774.3	4723.3	4303.98	4364.27	7509.8	6007.84	6007.84	6007.84	6007.84	6007.84	6007.84	6007.84	6007.84	6007.84	6007.84	6007.84	6007.84	6007.84	6007.84	6007.84	4806.27	1523.5	1553.97	1906.62	2009.42	2025.18	1146.57	160.882	158.885	156.778
Brazil 10	1101.11	2727.44	250.949	2314.84	4660.89	3728.72	4665.45	4254.85	4315.74	7440.47	5952.38	5952.38	5952.38	5952.38	5952.38	5952.38	5952.38	5952.38	5952.38	5952.38	5952.38	5952.38	5952.38	5952.38	5952.38	4761.9	1404.17	1437.36	1800.43	1886.42	1904.24	1045.81	99.058	57.6496	137.04	123.003
Brazil 11	1088.54	2706.42	280.046	2311.51	4649.1	3719.28	4653.89	4240.98	4301.72	7432.32	5945.85	5945.85	5945.85	5945.85	5945.85	5945.85	5945.85	5945.85	5945.85	5945.85	5945.85	5945.85	5945.85	5945.85	5945.85	4756.68	1430.24	1464.77	1830.45	1907.2	1929.06	1076.62	125.24	55.1394	156.5	105.139	31.5176
Brazil 12	991.242	2630.97	329.267	2202.09	4549.86	3639.89	4554.24	4145.72	4206.75	7327.59	5862.07	5862.07	5862.07	5862.07	5862.07	5862.07	5862.07	5862.07	5862.07	5862.07	5862.07	5862.07	5862.07	5862.07	5862.07	4689.66	1363.12	1405.03	1790.51	1818.96	1855.19	1049.54	199.31	57.0667	245.648	212.329	113.152	111.439
Brazil 13	1404.12	3070.02	113.567	2534.65	4942.01	3953.61	4944.75	4551.99	4613.81	7688.33	6150.66	4920.53	3936.42	3149.14	2519.31	2015.45	1612.36	1289.89	1031.91	825.528	660.422	528.338	422.67	338.136	270.509	216.407	1274.47	1278.24	1566.67	1835.58	1785.76	801.236	266.423	407.667	252.619	409.143	362.949	391.172	442.53
Brazil 14	1393.73	3053.09	95.3173	2536.71	4936.82	3949.45	4939.83	4544.21	4605.89	7967	6373.6	5098.88	4079.1	3263.28	2610.63	2088.5	1670.8	1336.64	1069.31	855.45	684.36	547.488	437.99	350.392	280.314	224.251	1304.7	1310.13	1601.87	1861.55	1816.01	836.217	239.712	384.967	221.548	377.316	337.755	364.946	422.906	35.8892
Uruguay 1 &2	2122.91	3789.33	1358.93	2703.31	5188.61	4150.89	5181.77	4903.26	4967.33	7671.33	6137.06	4909.65	3927.72	3142.18	2513.74	2010.99	1608.79	1287.03	1029.63	823.702	658.962	527.17	421.736	337.388	269.911	215.929	657.166	541.044	342.117	1196.33	916.655	519.645	1497.12	1573.67	1511.67	1657.98	1561.56	1592.65	1568.9	1289.78	1325.62
